# Supplementary material for: Preparation and characterization of solid DNA silver nanoclusters with superior aerobic and thermal stability
Source: Royal Society of Chemistry journal article supplement (doi:10.1039/c9ra04533c), 2019-01-01
Supplement: c9ra04533c1.pdf [file c9ra04533c1.pdf]

## **Supporting information**

# **Preparation and characterization of solid DNA silver nanoclusters with superior aerobic and thermal stability**

*Yang-Xiu Lin and Chih-Wei Chang\**

Department of Chemistry, National Changhua University of Education, Taiwan

\*Corresponding author: [cwchang@cc.edu.tw](mailto:cwchang@cc.edu.tw)

## Table of contents

Figure S1: (a) The plot of the absorbance vs. the integrated fluorescence of the r- AgNCs solution (10 mM ammonium acetate, pH=7.0) and the cresyl violet perchlorate methanol solution. The FL quantum yield (Q) of the r-AgNCs solution is calculated using the slope (m) of the linear fit of both lines. The FL quantum yield can be determined using the following equation: ..... 2

$$Q_{\text{red AgNCs}} = Q_{\text{cresyl violet}} \left( \frac{m_{\text{red AgNCs}}}{m_{\text{cresyl violet}}} \right) \left( \frac{\text{refractive index}_{\text{water}}}{\text{refractive index}_{\text{methanol}}} \right)^2 \dots\dots\dots 2$$

The raw data of the cresyl violet perchlorate methanol solution and the r-AgNCs aqueous solution is indicated in (b) and (c), respectively..... 2

Figure S2: The emission spectra of the r-AgNCs solution (a) degassed by the freeze-pump-thaw method and stored in anaerobic cuvette (b) stored in 4°C refrigerator. The inset shows the evolution of the relative FL intensity (F/F<sub>0</sub>) of the r-AgNCs. F indicates the integrated FL intensity measured at different days, while the F<sub>0</sub> indicates the integrated FL intensity of the as-prepared r-AgNCs solution..... 2

Figure S3: The emission spectra of the r-AgNCs-r, the r-AgNCs-v and the r-AgNCs-f dissolved in ammonium acetate solution: (a) no treatment ; (b) added 30µM NaBH<sub>4</sub> into the solution; (c) annealed the solution at 90° C for 10 minutes, and added 30µM NaBH<sub>4</sub> in the solution after cooling to the room temperature. The spectra of the as-prepared r-AgNCs are indicated by the gray dash-dot curves. .... 2

Figure S4 The steady-state excitation and emission spectra of the r-AgNCs-p. The intensity drop at the wavelength >830 nm is due to the low quantum efficiency of PMT at this range (R928)..... 2

Figure S5: The TEM image of the r-AgNCs-p (3 days) dissolved in 10 mM ammonium acetate buffer (pH=7.0). .... 2

Figure S6: Native polyacrylamide gel electrophoresis analysis of the as-prepared r-AgNCs and r-AgNCs recovered from the r-AgNCs-p. a: d[T<sub>2</sub>C<sub>3</sub>AC<sub>3</sub>AC<sub>4</sub>G<sub>2</sub>C<sub>3</sub>] DNA; b: as-prepared r-AgNCs solution ; c:r-AgNCs-p solution (0 days) d: r-AgNCs-p solution (129 days). The band I and II correspond to the signal of the d[T<sub>2</sub>C<sub>3</sub>AC<sub>3</sub>AC<sub>4</sub>G<sub>2</sub>C<sub>3</sub>] DNA and the r-AgNCs, respectively.2

Figure S7: Native polyacrylamide gel electrophoresis analysis of the as-prepared r-AgNCs and r-AgNCs recovered from the r-AgNCs-p. a: d[T<sub>2</sub>C<sub>3</sub>AC<sub>3</sub>AC<sub>4</sub>G<sub>2</sub>C<sub>3</sub>] DNA; b: as-prepared r-AgNCs solution; c:r-AgNCs-p solution (0 days) d: r-AgNCs-p solution (21 days). The PAGE was imaged under the 375 nm excitation. .... 2

Figure S8: The FL anisotropy decay dynamics of the r-AgNCs-p (28 days) solution. For comparison, the anisotropy decay of the as-prepared r-AgNCs is indicated by gray curve..... 2

Figure S9: The steady state spectra of the r-AgNCs solution stored at 70°C for 360 minutes. For comparison, the spectra of the as-prepared r-AgNCs is indicated by the gray dash-dot curves..... 2

Figure S10: The steady-state spectra of the precipitated Hum 22 AgNCs solution. The bracket indicates the days of the precipitated Hum 22 AgNCs stored in the laboratory drawers. The inset shows the time-evolution of the integrated FL intensity. The spectrum of the as-prepared Hum 22 AgNCs is indicated by gray dash-dot curve. .... 2

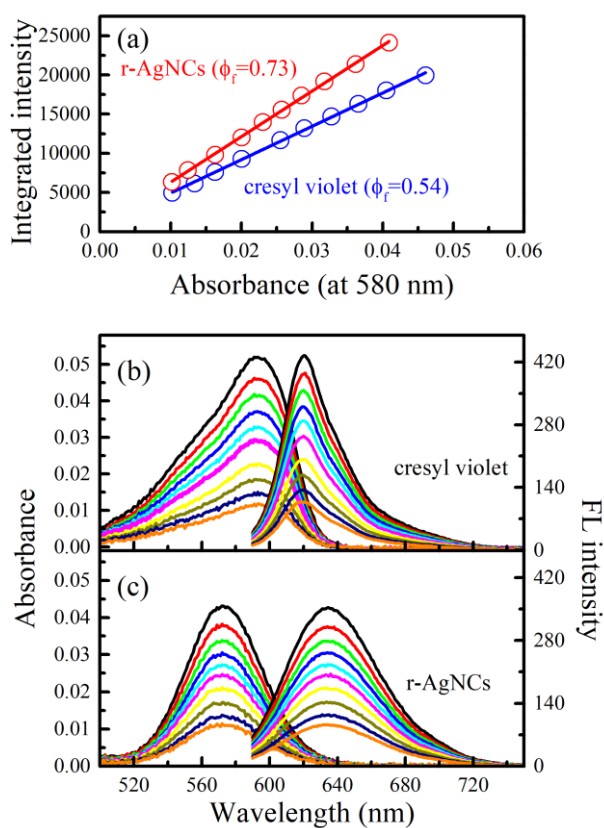

Figure S1: (a) The plot of the absorbance vs. the integrated fluorescence of the r-AgNCs solution (10 mM ammonium acetate, pH=7.0) and the cresyl violet perchlorate methanol solution. The FL quantum yield (Q) of the r-AgNCs solution is calculated using the slope (m) of the linear fit of both lines. The FL quantum yield can be determined using the following equation:

$$Q_{\text{red AgNCs}} = Q_{\text{cresyl violet}} \left( \frac{m_{\text{red AgNCs}}}{m_{\text{cresyl violet}}} \right) \left( \frac{\text{refractive index}_{\text{water}}}{\text{refractive index}_{\text{methanol}}} \right)^2$$

The raw data of the cresyl violet perchlorate methanol solution and the r-AgNCs aqueous solution is indicated in (b) and (c), respectively.

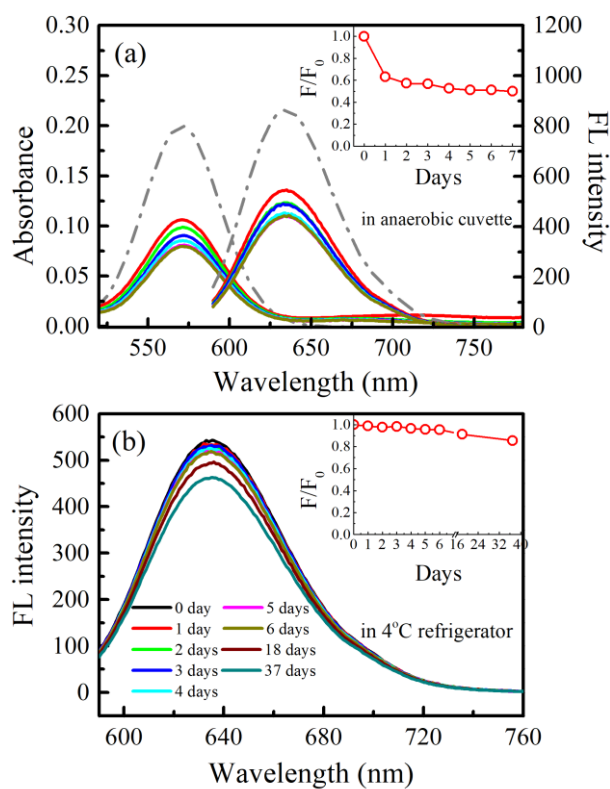

Figure S2: The emission spectra of the r-AgNCs solution (a) degassed by the freeze-pump-thaw method and stored in anaerobic cuvette (b) stored in 4°C refrigerator. The inset shows the evolution of the relative FL intensity ( $F/F_0$ ) of the r-AgNCs.  $F$  indicates the integrated FL intensity measured at different days, while the  $F_0$  indicates the integrated FL intensity of the as-prepared r-AgNCs solution.

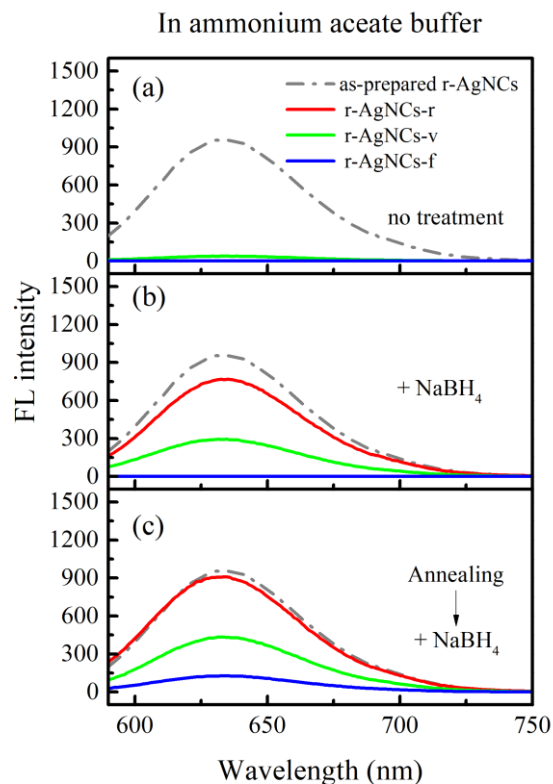

Figure S3: The emission spectra of the r-AgNCs-r, the r-AgNCs-v and the r-AgNCs-f dissolved in ammonium acetate solution: (a) no treatment ; (b) added 30 $\mu$ M NaBH<sub>4</sub> into the solution; (c) annealed the solution at 90° C for 10 minutes, and added 30 $\mu$ M NaBH<sub>4</sub> in the solution after cooling to the room temperature. The spectra of the as-prepared r-AgNCs are indicated by the gray dash-dot curves.

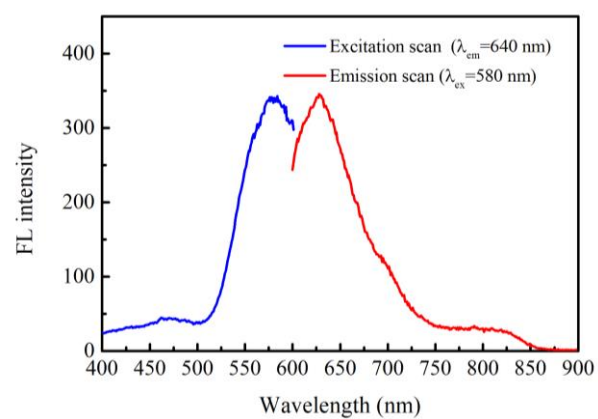

Figure S4 The steady-state excitation and emission spectra of the r-AgNCs-p. The intensity drop at the wavelength  $>830$  nm is due to the low quantum efficiency of PMT at this range (R928).

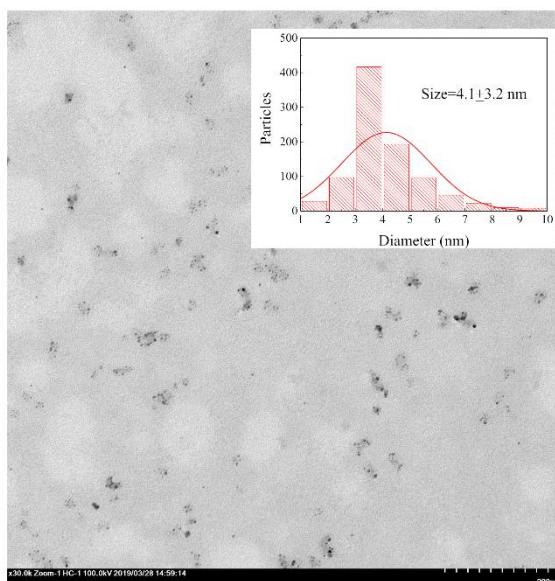

Figure S5: The TEM image of the r-AgNCs-p (3 days) dissolved in 10 mM ammonium acetate buffer (pH=7.0).



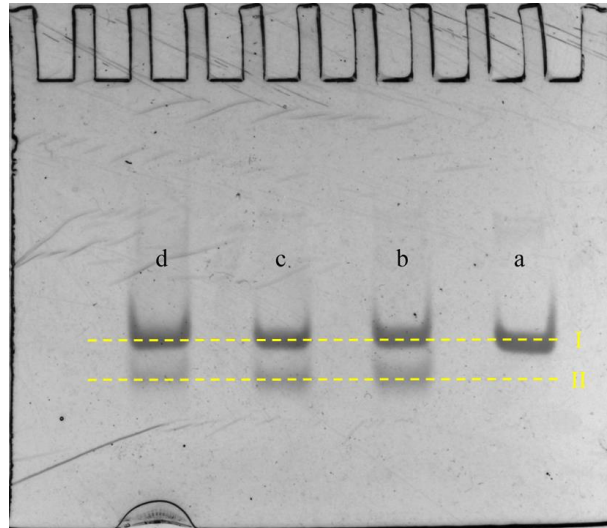

Figure S6: Native polyacrylamide gel electrophoresis analysis of the as-prepared r-AgNCs and r-AgNCs recovered from the r-AgNCs-p. a: d[T<sub>2</sub>C<sub>3</sub>AC<sub>3</sub>AC<sub>4</sub>G<sub>2</sub>C<sub>3</sub>] DNA; b: as-prepared r-AgNCs solution ; c:r-AgNCs-p solution (0 days) d: r-AgNCs-p solution (129 days). The band I and II correspond to the signal of the d[T<sub>2</sub>C<sub>3</sub>AC<sub>3</sub>AC<sub>4</sub>G<sub>2</sub>C<sub>3</sub>] DNA and the r-AgNCs, respectively.

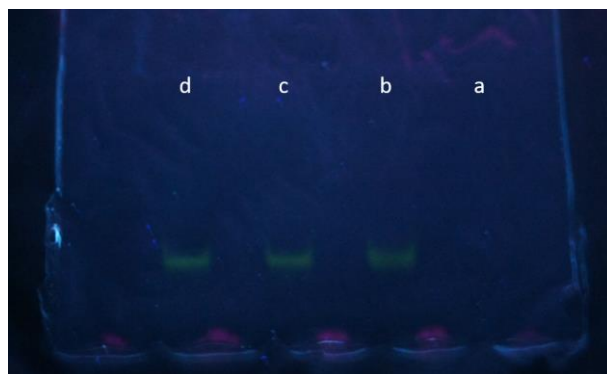

Figure S7: Native polyacrylamide gel electrophoresis analysis of the as-prepared r-AgNCs and r-AgNCs recovered from the r-AgNCs-p. a: d[T<sub>2</sub>C<sub>3</sub>AC<sub>3</sub>AC<sub>4</sub>G<sub>2</sub>C<sub>3</sub>] DNA; b: as-prepared r-AgNCs solution; c:r-AgNCs-p solution (0 days) d: r-AgNCs-p solution (21 days). The PAGE was imaged under the 375 nm excitation.

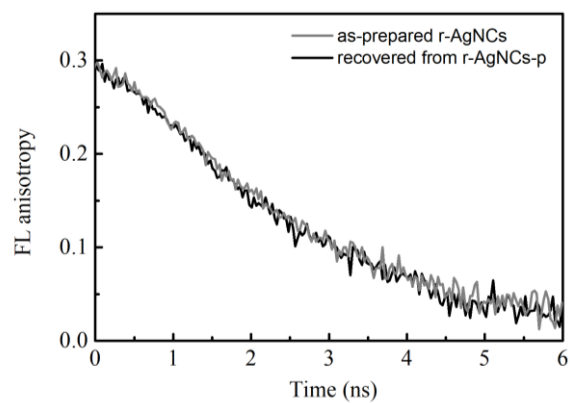

Figure S8: The FL anisotropy decay dynamics of the r-AgNCs-p (28 days) solution. For comparison, the anisotropy decay of the as-prepared r-AgNCs is indicated by gray curve.

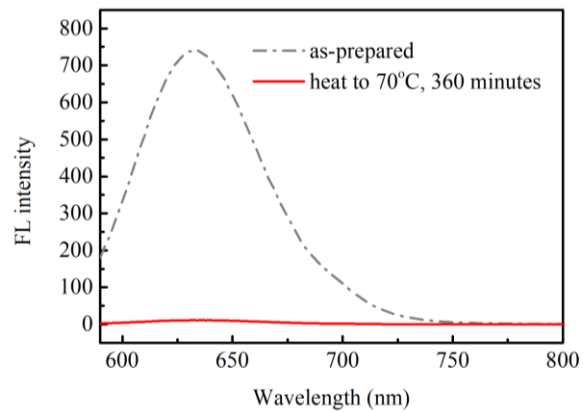

Figure S9: The steady state spectra of the r-AgNCs solution stored at 70°C for 360 minutes. For comparison, the spectra of the as-prepared r-AgNCs is indicated by the gray dash-dot curves.

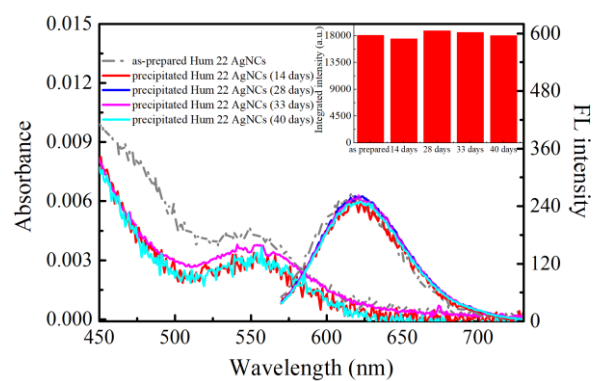

Figure S10: The steady-state spectra of the precipitated Hum 22 AgNCs solution. The bracket indicates the days of the precipitated Hum 22 AgNCs stored in the laboratory drawers. The inset shows the time-evolution of the integrated FL intensity. The spectrum of the as-prepared Hum 22 AgNCs is indicated by gray dash-dot curve.
